# Supplementary material
Source: PubMed Central journal article supplement (PMC4165656)

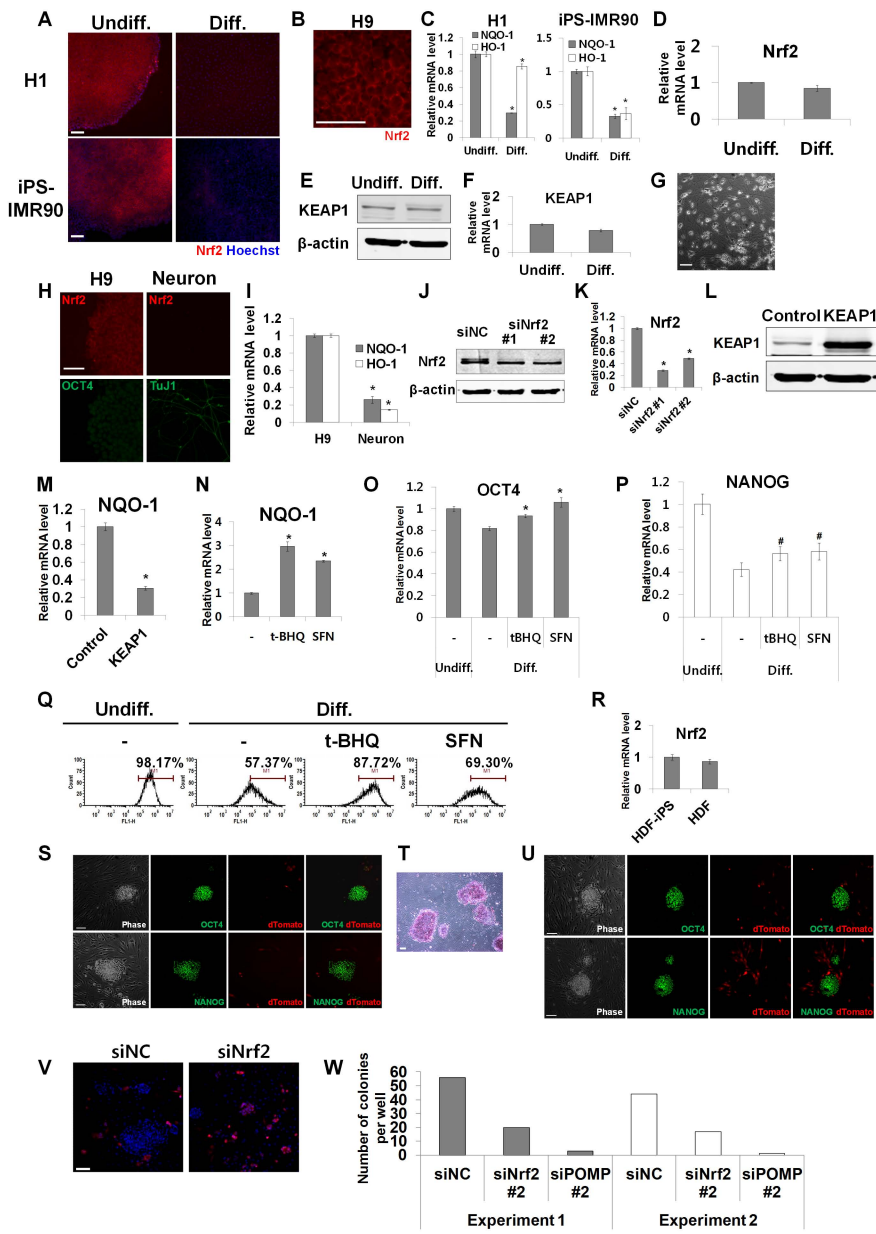

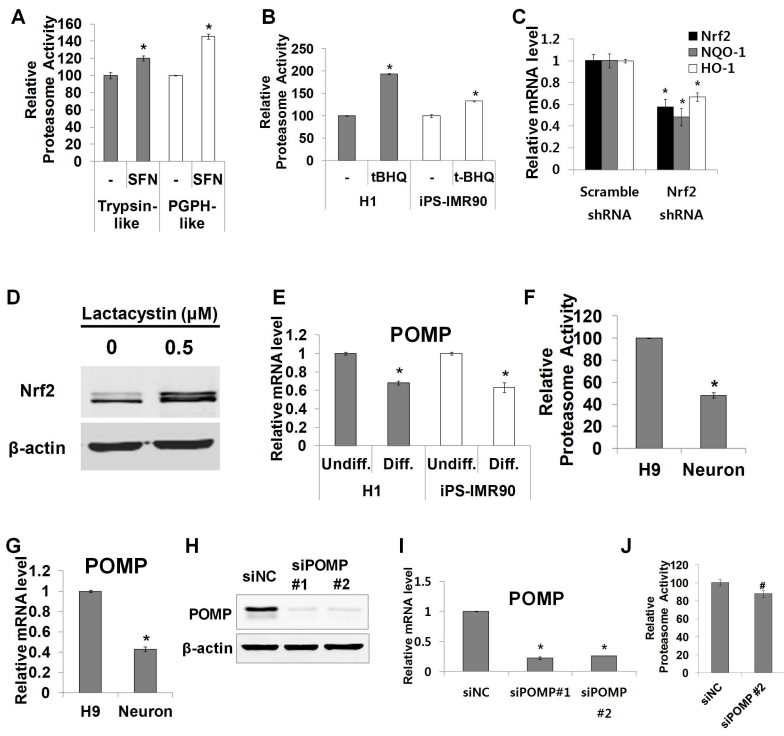

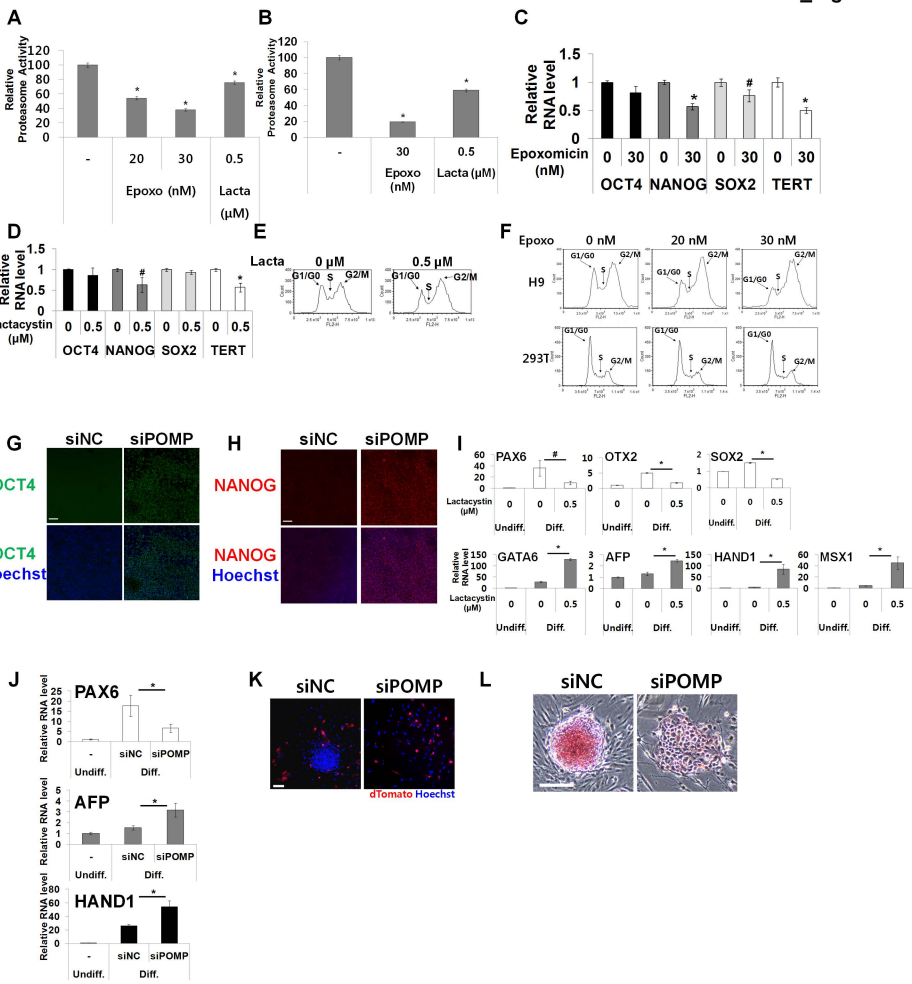

Supplement: NIHMS600996-supplement-Supp_Figure_S1-S3.pdf [file NIHMS600996-supplement-Supp_Figure_S1-S3.pdf]
